# Supplementary material for: Outcomes of SARS-CoV-2 infected pregnancies after medically assisted reproduction
Source: PubMed Central journal article supplement — Hum Reprod. 2021 Sep 13;36(11):2883–90. doi: 10.1093/humrep/deab218 (PMC8523208; doi:10.1093/humrep/deab218), 2021-09-13
Supplement: deab218_supplementary_data_file_s2.pdf [file deab218_supplementary_data_file_s2.pdf]

## Supplementary Data File S2

### List of contributors

|                                       |                        |                        |                |
|---------------------------------------|------------------------|------------------------|----------------|
| Walid Abou Rjeily                     | Lebanon                | Ayse Seyhan            | Turkey         |
| Cengiz Alataş                         | Turkey                 | Sergio Soares          | Portugal       |
| Tamal Alkon, Martha Luna              | Mexico                 | Barbara Sonntag        | Germany        |
| Devleta Balic                         | Bosnia and Herzegovina | Eva Stastna            | Czech Republic |
| Alberto Barros                        | Portugal               | Anupama Suwal Gurung   | Nepal          |
| Nicole Beckers                        | The Netherlands        | Margarita Torres Vives | Spain          |
| Rashida Begum                         | Bangladesh             | Mert Turgal            | Turkey         |
| Frederico Boeykens                    | Argentina              | Pedro Xavier           | Portugal       |
| Ioan Boleac                           | Romania                |                        |                |
| Cosmina Bunescu                       | Romania                |                        |                |
| Carlos Calhaz-Jorge                   | Portugal               |                        |                |
| Antonio Colicchia                     | Italy                  |                        |                |
| Irida Dajti                           | Albania                |                        |                |
| Marjolein De Vreis                    | The Netherlands        |                        |                |
| Samuel Dos Santos Ribeiro             | Portugal               |                        |                |
| Marija Dundovic                       | Croatia                |                        |                |
| Victoria Antequera Duran              | Spain                  |                        |                |
| Mohamed Mamdouh Elhusien              | Egypt                  |                        |                |
| Sandro Esteves                        | Brazil                 |                        |                |
| Eduarda Felgueira                     | Portugal               |                        |                |
| Ewa Goncikowska                       | Poland                 |                        |                |
| Enric Güell                           | Spain                  |                        |                |
| Ernestine Gwet-Bell                   | Cameroon               |                        |                |
| Lara Heleno, Joana Mesquita Guimarães | Portugal               |                        |                |
| Mitrانovici Melinda Ildiko            | Romania                |                        |                |
| Guvenc Karlikaya                      | Turkey                 |                        |                |
| Nalini Kaul-Mahajan                   | India                  |                        |                |
| Kseniia Khahylenko                    | Ukraine                |                        |                |
| Peter Kovacs                          | Hungary                |                        |                |
| Manja Krause                          | Germany                |                        |                |
| Aswathy Kumaran                       | India                  |                        |                |
| Manu Lkshmi                           | India                  |                        |                |
| Daniela Nogueira                      | France                 |                        |                |
| Aylin Pelin Cil                       | Turkey                 |                        |                |
| Valeriia Pelvina                      | Russian Federation     |                        |                |
| Fernanda Polisseni                    | Brazil                 |                        |                |
| Roxana Popovici                       | Germany                |                        |                |
| Mahadinata Putra                      | Indonesia              |                        |                |
| Kamal Eldin Rageh                     | Egypt                  |                        |                |
| Nazdar Raouf                          | Iraqi Kurdistan        |                        |                |
| Edo Rezaldy Edward                    | Indonesia              |                        |                |
| Ricardo Sertã                         | Brazil                 |                        |                |

(continued)
